# Supplementary material for: An Indian national survey of therapeutic drug monitoring with anti-tumor necrosis (TNF) medications in inflammatory bowel disease
Source: PubMed Central journal article supplement (PMC7297832; doi:10.1007/s12664-020-01047-6), 2020-06-01
Supplement: 12664_2020_1047_MOESM1_ESM.pdf [file 12664_2020_1047_MOESM1_ESM.pdf]

## TDM Questionnaire for India

Q1. Please tell us where do you work? (Tick all that apply)

- A) Government Medical college
- B) Private Medical college
- C) Private group practice/ Corporate hospital
- D) Private individual practice

Q2. Please tell us which city do you practice in :

- A) Tier 1 (Metropolitan)
- B) Tier 2 (Other state capitals)
- C) Tier 3 (all other cities)

Q3. Please tell us your grade:

- A) Consultant – gastroenterologist
- B) Physician with special interest in GI
- C) Gastroenterology trainee
- D) Other (please specify)

Q4. What is your gender?

- A) Male
- B) Female

Q5. What is your age?

- A) 25-34 years
- B) 35-44 years
- C) 46-54 years
- D) 55-64 years
- E) ≥65 years

Q6. How many years (after your specialist certification) have you been in practice?

- A) 0(still in training)
- B) <1 year
- C) 1-4 years
- D) 5-9 years
- E) 10-19 years
- F) >20 years

Q7. What percentage of your patients have inflammatory bowel disease (IBD)?

- A) <10%

- B) 11-25%
- C) 26-50%
- D) >50%

Q8. How many patients with IBD do you evaluate and/or treat on average in a one-month period? (Please provide your best estimate. If <5: Thank you for your participation. This survey refers exclusively to medical practitioners who evaluate and/or treat  $\geq 5$  IBD patients on average in a one month period)

- A) <5
- B) 5-10
- C) 11-20
- D) 20-30
- E) >30

Q9. In any given month, on average how many of your IBD patients are treated with anti-TNF therapy? (Please provide your best estimate. If 0: Thank you for your participation. This survey refers exclusively to medical practitioners who use anti-TNF therapy to treat IBD)

- A) 0
- B) 1-4
- C) 5-10
- D) 11-20

Q10. Do you check anti-TNF drug concentrations and anti-drug antibodies? (If no, go to question 13)

- A) Yes
- B) NO

Q11. In which clinical scenarios do you check anti-TNF drug concentrations to your IBD patients? (You can check more than one)

- A) Secondary loss of response (patients who initially responded to anti-TNF therapy but now develop symptoms of active IBD)
- B) Primary nonresponse (post-induction)
- C) Re-starting anti-TNF therapy after a drug holiday
- D) Proactive therapeutic drug monitoring (during maintenance therapy in patients responding to anti-TNF therapy)

Q12. How often do you check anti-TNF drug concentrations during maintenance therapy in patients responding to anti-TNF therapy (proactive therapeutic drug monitoring)?

- A) Never
- B) Every 2 months
- C) Every 6 months
- D) Every 12 months

- E) Every 24 months
- F)  $\geq 24$  months

Q13. Indicate how much you agree or disagree with the following statements regarding barriers to the implementation of therapeutic drug monitoring (TDM) of anti-TNF therapy in real-life clinical practice.

|                                                                              | Strongly disagree | Somewhat disagree | Neither agree nor disagree | Somewhat agree | Strongly agree |
|------------------------------------------------------------------------------|-------------------|-------------------|----------------------------|----------------|----------------|
| Test is expensive                                                            |                   |                   |                            |                |                |
| Uncertainty about availability in my practice                                |                   |                   |                            |                |                |
| Lack of overall knowledge of TDM                                             |                   |                   |                            |                |                |
| Lack of knowledge on how to interpret and what to do with the results of TDM |                   |                   |                            |                |                |
| Time lag from serum sampling to results of TDM                               |                   |                   |                            |                |                |
| TDM is cumbersome and/or time consuming                                      |                   |                   |                            |                |                |
| Lack of good evidence-based medicine of the usefulness of TDM in IBD         |                   |                   |                            |                |                |
| Lack of clinical guidelines recommending the use of TDM                      |                   |                   |                            |                |                |

Q14. If all barriers were removed, would you check anti-TNF drug concentrations? (Only for participants who replied no to question 10. If yes, go to question 16/If no, end of survey, thank you very much for your participation)

- A) Yes
- B) No

Q15. If all barriers were removed, in which clinical scenarios would you check anti-TNF drug concentrations to your IBD patients? (You can check more than one)

- A) Secondary loss of response (patients on anti-TNF who had responded but now develop symptoms of active IBD)
- B) Primary nonresponse (post-induction)
- C) Re-starting anti-TNF therapy after a drug holiday
- D) Proactive therapeutic drug monitoring (during maintenance therapy in patients responding to anti-TNF therapy)

Q16. If all barriers were removed, how often would you check anti-TNF drug concentrations during maintenance therapy in patients responding to anti-TNF therapy (proactive therapeutic drug monitoring)?

- A) Never
- B) Every 2 months
- C) Every 6 months
- D) Every 12 months
- E) Every 24 months
- F)  $\geq 24$  months
